# Supplementary material for: Jellyfish Bioprospecting in the Mediterranean Sea: Antioxidant and Lysozyme-Like Activities from Aurelia coerulea (Cnidaria, Scyphozoa) Extracts
Source: MDPI journal article supplement (doi:10.3390/md19110619), 2021-10-31
Supplement: s1 [file s1]

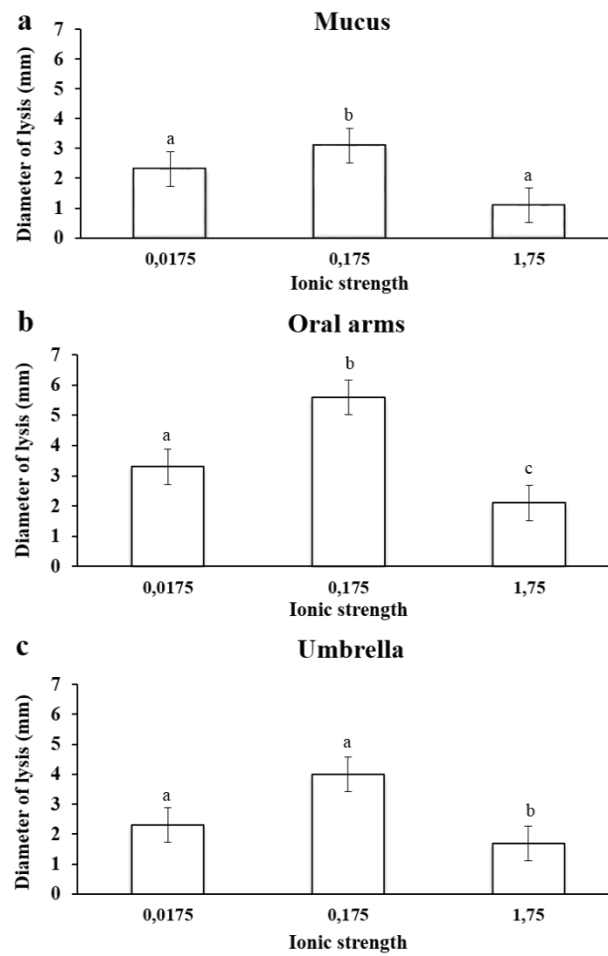

**Figure S1.** Effect of the ionic strength on the lysozyme-like activity of *A. coerulea* mucus (a), oral arms (b) and umbrella (c). Data are reported as mean value  $\pm$  standard deviation. Sharing letters indicate absence of significant differences.
